# Supplementary material for: Synthesis of AgCl hollow cubes and their application in photocatalytic degradation of organic pollutants
Source: Royal Society of Chemistry journal article supplement (doi:10.1039/c4ce02268h), 2015-01-01
Supplement: c4ce02268h1.pdf [file c4ce02268h1.pdf]

## Supporting Information

Ion chromatography (ICS-1100, Dionex Ionpac™ AG11-HC, Current Speed: 1.0 ml·min<sup>-1</sup>, Temperature:30 °C, Pressure:1604 psi, SRS current: 8 mA) was used to detect the Ag<sup>0</sup> content in the sample Ag/AgCl-1, Ag/AgCl-2, and Ag/AgCl-3. All samples at 45 °C for 24 hours in vacuum. 0.1 g silver chloride dissolved in 25 ml of 1 mol·L<sup>-1</sup> aqueous ammonia. All of the results were shown in the table S1.

The added photocatalytic activities experiments were done under the 250 W Xenon lamp (HAL-320, Asahi Spectra Co., Ltd.). The experiments were performed at room temperature as follows: 100 mg of the photocatalyst was added to 100 mL of MO solution (10 mg·L<sup>-1</sup>) in a Pyrex reactor. Before illumination, the suspension was stirred in the dark for 30 min to ensure the establishment of an adsorption-desorption equilibrium between the photocatalyst and MO. The dispersion was then exposed to the light irradiation under stirring. At given time intervals, 4 mL of the suspension was pipetted into a centrifuge tube and centrifuged at 8000 rpm for 2 min to remove the remnant photocatalyst. The results were shown in figure S5. After irradiation for 10 min, about 97% of MO was removed over the Ag/AgCl-2. The results is similar with ref. 2 and 40.

Table S1 Atomic composition analysis and the Ag:AgCl ratio

| sample    | atomic composition (Ag:Cl) | atomic ratio of Ag <sup>0</sup> to Ag <sup>I</sup> |
|-----------|----------------------------|----------------------------------------------------|
| Ag/AgCl-1 | 51.2 : 48.8                | 4.9:100                                            |
| Ag/AgCl-2 | 52.3 : 47.7                | 9.6:100                                            |
| Ag/AgCl-3 | 53.1 : 46.9                | 13.2:100                                           |

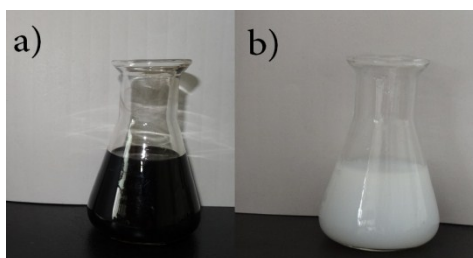

Figure S1. The digital images of (a) Ag<sup>0</sup> seeds and (b) AgCl in aqueous dispersion.

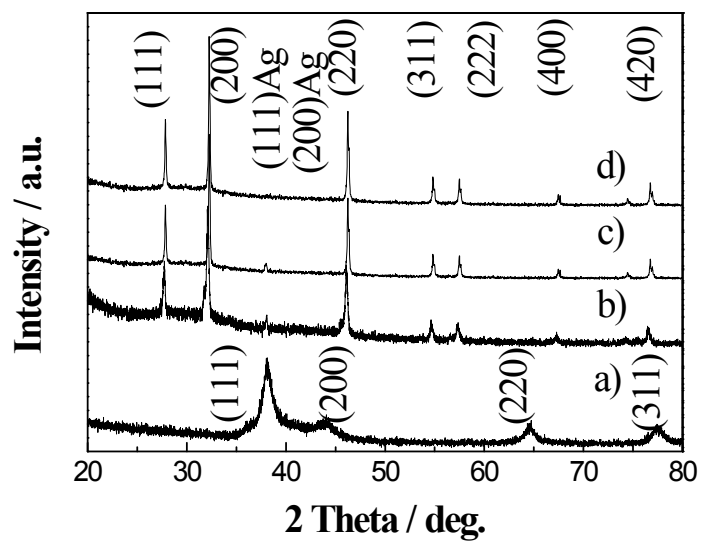

Figure S2. XRD patterns of (a) the Ag<sup>0</sup> seeds, (b) the reddish powder sample of AgCl@Ag, and the samples with flower-like morphology (c) and pseudo-cubic morphology (d).

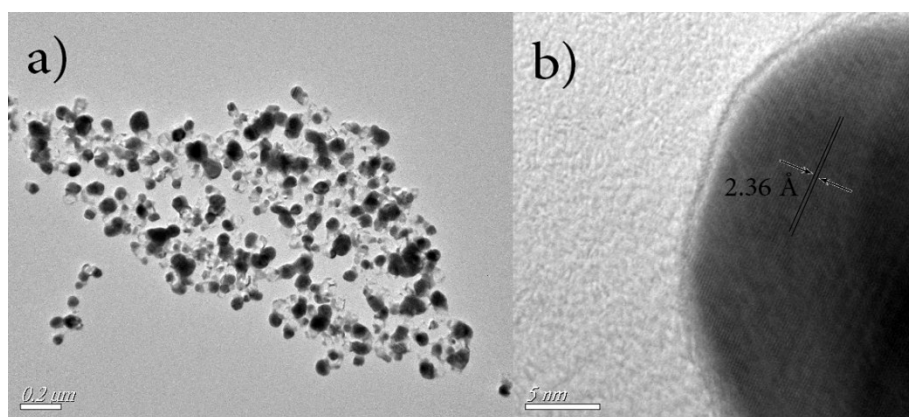

Figure S3. (a) TEM and (b) HRTEM images of the Ag seeds.

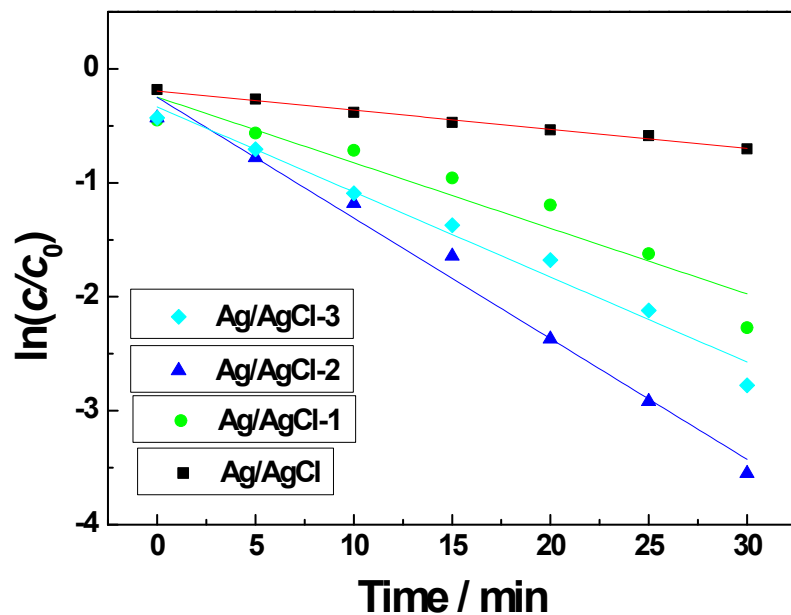

Figure S4. Pseudo-first-order plots of  $\ln(c/c_0)$  vs. reaction time in the presence of Ag/AgCl and AgCl catalysts.

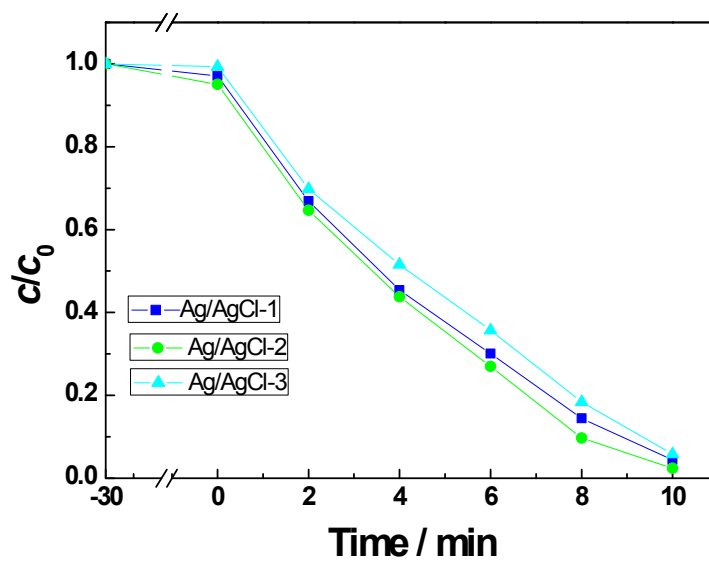

**Figure S5.** Photodegradation of MO with catalysts of Ag/AgCl hollow cubes under Xe lamp irradiation.  $c_0$  is the initial concentration of MO aqueous solution ( $10 \text{ mg}\cdot\text{L}^{-1}$ ), and  $c$  is the instantaneous concentration of MO solution during photodegradation.

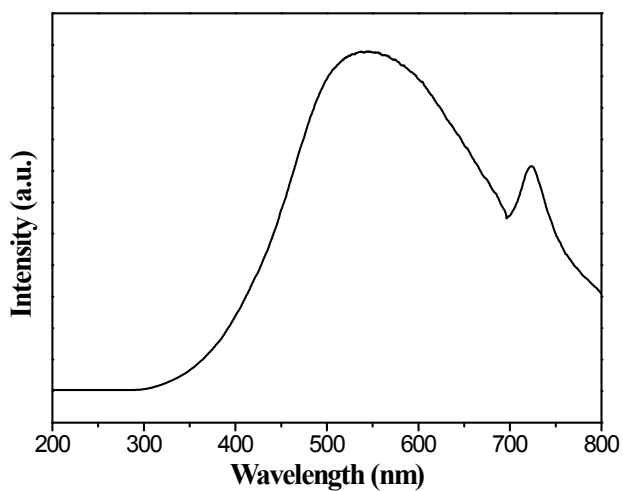

**Figure S6.** The output spectrum of the tungsten lamp
